# Supplementary material for: A flame-retardant polyimide interlayer with polysulfide lithium traps and fast redox conversion towards safety and high sulfur utilization Li–S batteries
Source: Royal Society of Chemistry journal article supplement (doi:10.1039/d1nr07173d), 2021-12-17
Supplement: d1nr07173d1.pdf [file d1nr07173d1.pdf]

## Supplementary information

# A flame-retardant polyimide interlayer with polysulfide lithium traps and fast redox conversion towards safety and high sulfur utilization Li-S batteries

*Zhiyu Zhou<sup>ab</sup>, Zexiang Chen<sup>ab\*</sup>, Yang Zhao<sup>ab</sup>, Huifang Lv<sup>ab</sup>, Hualiang Wei<sup>ab</sup>,  
Bingbing Chen<sup>c</sup>, Zengjie Gu<sup>d</sup>, and Yan Wang<sup>ab\*</sup>*

<sup>a</sup>School of Optoelectronic Science and Engineering, University of Electronic Science and Technology of China, 611731 Chengdu, China

<sup>b</sup>Sichuan Province Key Laboratory of Display Science and Technology, Jianshe North Road 4, 610054 Chengdu, China

<sup>c</sup>Department of Energy Science and Engineering, Nanjing Tech University, Nanjing, 210009, China

<sup>d</sup>Science and Technology on Vacuum Technology and Physics Laboratory, Lanzhou Institute of Physics, No.108, Yanxing Road, 730000 Lanzhou, China

E-mail: zxchen@uestc.edu.cn (Zexiang Chen); wangyan127@uestc.edu.cn (Yan Wang)

## DFT computations

All first-principle calculations were based on the Vienna Ab Initio Package (VASP)<sup>1</sup>,<sup>2</sup> within the generalization (GGA) using the Perdew-Burke-Ernzerhof (PBE) formulation<sup>3</sup>. Ionic cores were depicted with projected augmented wave (PAW) potentials<sup>4,5</sup>, and the valence electrons were taken into account using a plane wave basis set (400 eV kinetic energy cutoff). Partial occupancies of the Kohn-Sham orbitals were allowed using the Gaussian smearing method and a width of 0.05 eV. The electronic energy was regarded as self-consistent when the energy change was lower than  $10^{-7}$  eV. A geometry optimization was considered convergent when the energy change was less than  $10^{-6}$  eV. Grimme's DFT-D3 methodology<sup>6</sup> was used to describe the dispersion interactions among all atoms in the PI monomer and corresponding adsorption models.

The equilibrium lattice constant of the PI monomer in the  $x$  direction was optimized when setting  $y = z = 15$  Å and using a  $1 \times 1 \times 1$  Monkhorst-Pack k-point grid for Brillouin zone sampling. The optimized lattice constant was found to be  $x = 22.20$  Å. Full relaxation was permitted for all atoms during structure optimization. The adsorption energy ( $E_{ads}$ ) of the adsorbate was specified as Equation S1:

$$E_{ads} = E_{LiS/polyimide} - E_{polyimide} - E_{LiS} \quad (S1)$$

where  $E_{LiS/polyimide}$ ,  $E_{polyimide}$  and  $E_{LiS}$  are the energy of the adsorbate  $Li_2S_n$  ( $n = 1, 2, 4, 6$ ) after being adsorbed on PI, the energy of pristine PI, and the energy of isolated  $Li_2S_n$  ( $n = 1, 2, 4, 6$ ) molecules in a cubic periodic box with a side length of 20 Å and a  $1 \times 1 \times 1$  Monkhorst-Pack k-point grid for Brillouin zone sampling, respectively.

**Table S1.** Slope values obtained from linear fitting of the peak current ( $i_p$ ) versus square root of the scan rate ( $v^{0.5}$ ) plots shown in Fig. 4d–f.

| Slope values of linear fitting lines [mA (V/s) <sup>-1/2</sup> ] |         |         |          |
|------------------------------------------------------------------|---------|---------|----------|
| Configuration                                                    | Peak I  | Peak II | Peak III |
| Bare                                                             | 310.80  | 182.66  | 241.52   |
| With SS-PI interlayer                                            | 670.77  | 357.45  | 503.72   |
| With Ni/SS-PI interlayer                                         | 1235.13 | 636.50  | 759.08   |

**Table S2.** Fitted Tafel slope values derived from the Tafel plots shown in Fi. 4g–i.

| Values of fitted Tafel slopes [mV/dec] |               |               |               |
|----------------------------------------|---------------|---------------|---------------|
| Configuration                          | 2.16 V–2.34 V | 2.37 V–2.46 V | 2.01 V–2.07 V |
| Bare                                   | 198.1         | 67.7          | 126.2         |
| With SS-PI interlayer                  | 147.6         | 54.5          | 67.6          |
| With Ni/SS-PI interlayer               | 117.2         | 32.6          | 27.9          |

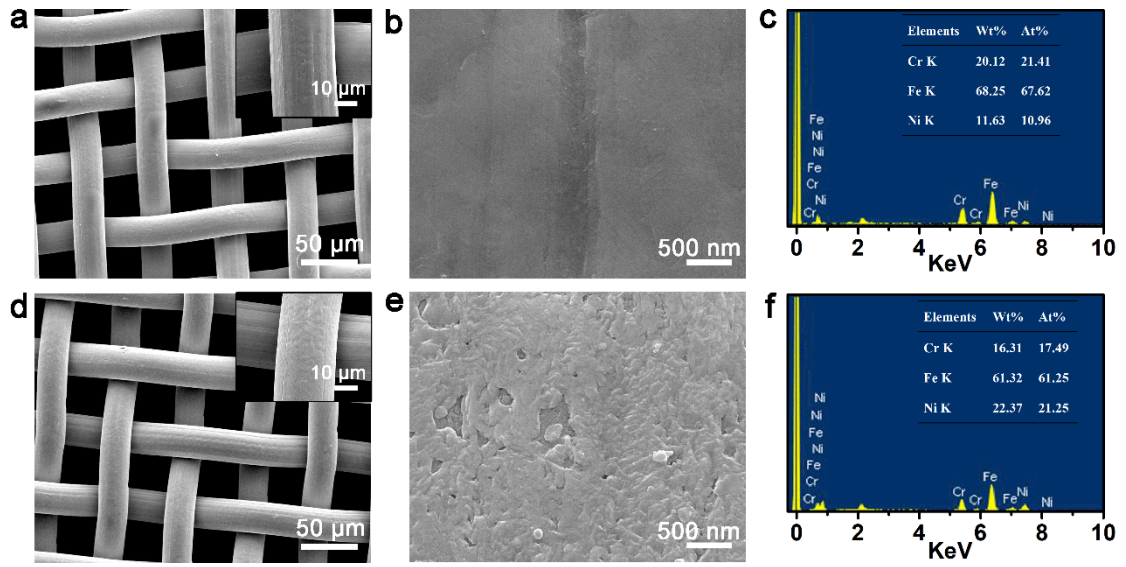

**Fig. S1.** SEM images of the un plated SS surface at (a) low and (b) high magnification. (c) EDS maps of the un plated SS surface. SEM images of the Ni-plated SS surface at (d) low and (e) high magnification. (f) EDS maps of the Ni/SS surface.

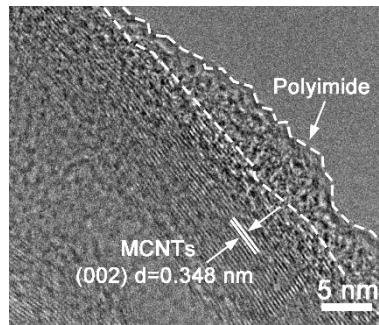

**Fig. S2.** TEM image of the PI/MCNT compounds at high magnification. Amorphous PI covers the surface of the MCNTs.

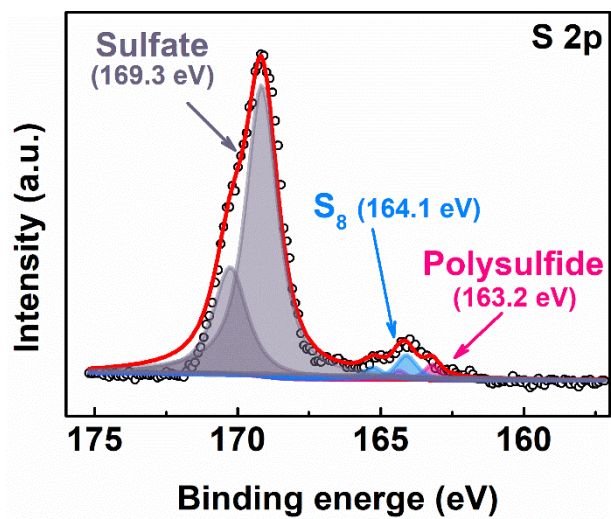

**Fig. S3.** S 2p XPS spectrum of the SS-PI interlayer after 50 cycles.

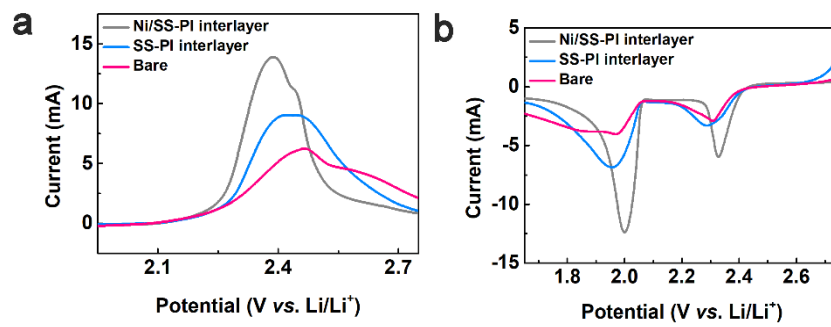

**Fig. S4.** LSV curves (obtained at a scan rate of  $0.2 \text{ mV s}^{-1}$ ) for the (a) anodic peak corresponding to the oxidation of  $\text{Li}_2\text{S}$  to sulfur and (b) two cathodic peaks corresponding to the reduction of sulfur to  $\text{Li}_2\text{S}$ .

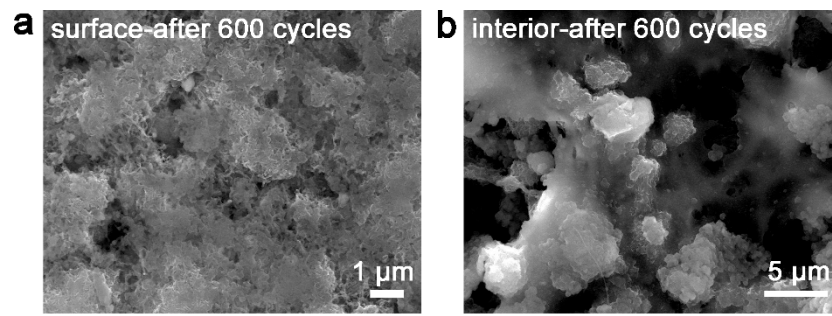

**Fig. S5.** SEM images of the a) surface and b) interior of Ni/SS-PI interlayer over 600 cycles at 0.5 C.



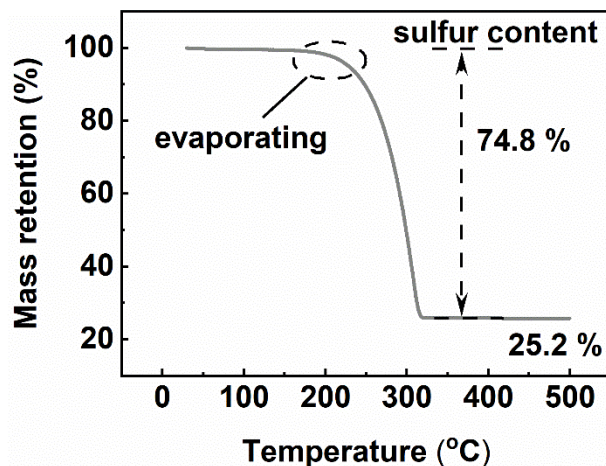

**Fig. S6.** TGA curve for the active material mixture consisting of sulfur, MCNTs and Super-P, which was used to prepare the cathode.

The sulfur content of the cathode is calculated based on TGA (Fig. S6). As it shown, the sulfur content is 74.8% by mass of the mixture of sulfur, MCNTs and Super-P. After the PVDF binder is added into the mixture to prepare the active material slurry, the sulfur content in cathode turns into 67.3% due to the additional 10% mass ratio of PVDF binder.

**Video S1.** Burning tests for Ni/SS gauze on a continuous flame.

**Video S2.** Burning tests for Ni/SS-PI interlayer on a continuous flame.

### Supporting references

1. G. Kresse and J. Furthmüller, Efficiency of ab-initio total energy calculations for metals and semiconductors using a plane-wave basis set, *Comput. Mater. Sci.*, 1996, **6**, 15-50.
2. G. Kresse and J. Furthmüller, Efficient iterative schemes for ab initio total-energy calculations using a plane-wave basis set, *Phys. Rev. B*, 1996, **54**, 11169.
3. J. Perdew, K. Burke and M. Ernzerhof, Generalized gradient approximation made simple [Phys. Rev. Lett. 77, 3865 (1996)], *Phys. Rev. Lett.*, 1997, **78**.
4. G. Kresse and D. Joubert, From ultrasoft pseudopotentials to the projector augmented-wave method, *Phys. Rev. B*, 1999, **59**, 1758-1775.

5. P. Blöchl, Projector augmented-wave method, *Phys. Rev. B*, 1995, **50**, 17953-17979.
6. S. Grimme, J. Antony, S. Ehrlich, H. Krieg, A consistent and accurate ab initio parametrization of density functional dispersion correction (DFT-D) for the 94 elements H-Pu, *J. Chem. Phys.*, 2010, **132**, 154104.
